# Supplementary material
Source: Springer Nature journal article supplement (https://www.springermedizin.de/resource/supplementary/12958_2012_984_MOESM4_ESM.pdf/9566564)

**Estradiol Level**

|                                    | Day of HCG | D11     | D9      | D7      | D3     |
|------------------------------------|------------|---------|---------|---------|--------|
| Group 1-A rfsh +low dose hCG < 40y | 8354.51    | 6187.33 | 3421.64 | 930.31  | 112.23 |
| Group 1-B rfsh < 40y               | 8226.81    | 6242.05 | 3078.93 | 1063.91 | 114.73 |

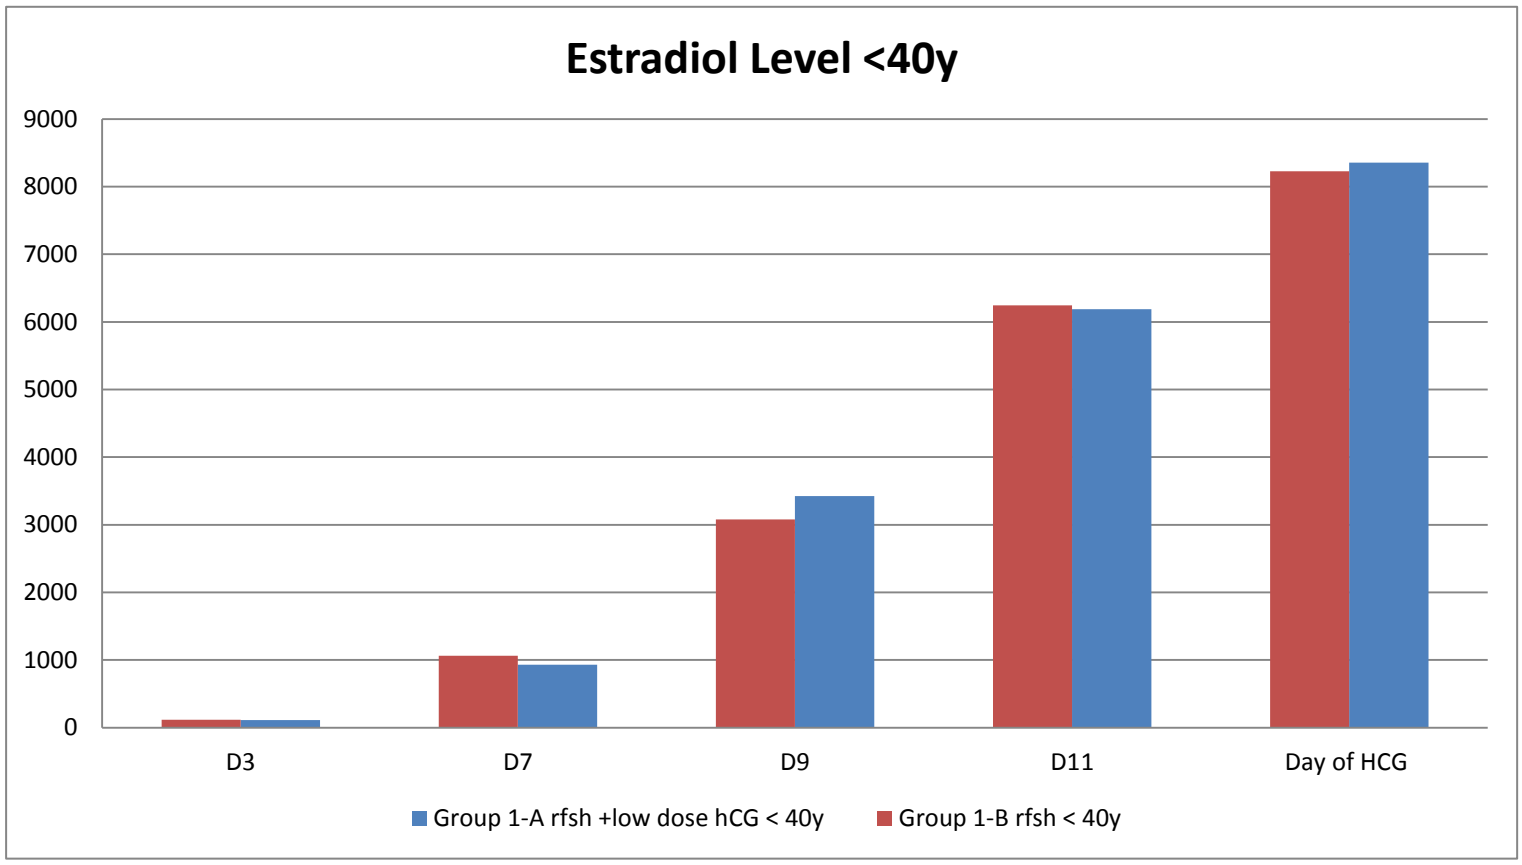

Supplement: MOESM4 [file 9566564]
